# Systematic Analysis of Immune Infiltrates in High-Grade Serous Ovarian Cancer Reveals CD20, FoxP3 and TIA-1 as Positive Prognostic Factors

Katy Milne<sup>1</sup>, Martin Köbel<sup>2</sup>, Steven E. Kalloger<sup>2</sup>, Rebecca O. Barnes<sup>1</sup>, Dongxia Gao<sup>3</sup>, C. Blake Gilks<sup>2</sup>, Peter H. Watson<sup>1,3,4</sup>, Brad H. Nelson<sup>1,4,5\*</sup>

**1** Trev and Joyce Deeley Research Centre, BC Cancer Agency, Victoria, British Columbia, Canada, **2** Department of Anatomical Pathology, Vancouver General Hospital, Vancouver, British Columbia, Canada, **3** Department of Pathology, University of British Columbia, Vancouver, British Columbia, Canada, **4** Department of Biochemistry and Microbiology, University of Victoria, Victoria, British Columbia, Canada, **5** Department of Medical Genetics, University of British Columbia, Vancouver, British Columbia, Canada

## Abstract

**Background:** Tumor-infiltrating T cells are associated with survival in epithelial ovarian cancer (EOC), but their functional status is poorly understood, especially relative to the different risk categories and histological subtypes of EOC.

**Methodology/Principal Findings:** Tissue microarrays containing high-grade serous, endometrioid, mucinous and clear cell tumors were analyzed immunohistochemically for the presence of lymphocytes, dendritic cells, neutrophils, macrophages, MHC class I and II, and various markers of activation and inflammation. In high-grade serous tumors from optimally debulked patients, positive associations were seen between intraepithelial cells expressing CD3, CD4, CD8, CD45RO, CD25, TIA-1, Granzyme B, FoxP3, CD20, and CD68, as well as expression of MHC class I and II by tumor cells. Disease-specific survival was positively associated with the markers CD8, CD3, FoxP3, TIA-1, CD20, MHC class I and class II. In other histological subtypes, immune infiltrates were less prevalent, and the only markers associated with survival were MHC class II (positive association in endometrioid cases) and myeloperoxidase (negative association in clear cell cases).

**Conclusions/Significance:** Host immune responses to EOC vary widely according to histological subtype and the extent of residual disease. TIA-1, FoxP3 and CD20 emerge as new positive prognostic factors in high-grade serous EOC from optimally debulked patients.

**Citation:** Milne K, Köbel M, Kalloger SE, Barnes RO, Gao D, et al. (2009) Systematic Analysis of Immune Infiltrates in High-Grade Serous Ovarian Cancer Reveals CD20, FoxP3 and TIA-1 as Positive Prognostic Factors. PLoS ONE 4(7): e6412. doi:10.1371/journal.pone.0006412

**Editor:** Derya Unutmaz, New York University School of Medicine, United States of America

**Received:** May 19, 2009; **Accepted:** June 26, 2009; **Published:** July 29, 2009

**Copyright:** © 2009 Milne et al. This is an open-access article distributed under the terms of the Creative Commons Attribution License, which permits unrestricted use, distribution, and reproduction in any medium, provided the original author and source are credited.

**Funding:** The study was funded by grants from the British Columbia Cancer Foundation, Vancouver General Hospital Foundation, and U.S. Dept. of Defense (OC000018). None of the sponsors had any role in the design and conduct of the study, in the collection, analysis, and interpretation of the data, or in the preparation, review, or approval of the manuscript.

**Competing Interests:** The authors have declared that no competing interests exist.

\* E-mail: bnelson@bccancer.bc.ca

## Introduction

Ovarian cancer is the most deadly gynecologic cancer, affecting more than 190,000 women worldwide each year (International Agency for Research on Cancer). Delayed diagnosis and the presence of widely disseminated disease account for the high mortality associated with the disease. Additionally, while a large percentage of patients initially respond well to cytoreductive surgery and standard chemotherapy, the disease usually recurs within 2-5 years as residual tumor cells develop resistance to chemotherapy [1,2]. Although prognosis is often poor, numerous favorable prognostic indicators have been described, including early stage, low grade and optimal surgical debulking [3,4].

Several recent studies have analyzed the influence of host immunity on disease prognosis. Tumor-infiltrating CD3+ T cells are strongly associated with favorable prognosis, specifically when CD3+ cells are localized within tumor epithelium [5-9]. These findings have been extended to the CD8+ T cell subset in particular [10-17], suggesting that cytotoxic T lymphocytes (CTLs)

play an important role in the antitumor immune response. Accordingly, other factors associated with CTL responses are also positively associated with survival, including interferon- $\gamma$  (IFN- $\gamma$ ) [18,19], the IFN- $\gamma$  receptor [20], interferon regulatory factor (IRF)-1 [21], IL-18 [22], TNF- $\alpha$  [23], MHC class I [24-26], and MHC class I antigen processing machinery [17].

In contrast to CD8+ T cells, several studies have indicated that tumor-infiltrating CD25+FoxP3+ T cells (referred to as regulatory T cells or Tregs) are associated with decreased survival [10,27-29]. Tregs have the ability to suppress proliferation, cytokine production, and cytolytic activity of CD4+ and CD8+ T cells by mechanisms involving cell-to-cell contact and the release of cytokines such as TGF- $\beta$  [30,31]. Tregs can also induce an immunosuppressive phenotype in other cell types such as macrophages [32]. Although Tregs have been associated with poor prognosis in many cancers, several exceptions have recently been reported. Leffers et al. found that FoxP3+ infiltrates in advanced stage EOC were associated with increased survival [14]. Similar findings have been reported in colorectal cancer [33] and

lymphoma [34-36]. Furthermore, in murine models, FoxP3+ cells can play a positive role in anti-tumor and anti-viral immunity [37,38]. The precise role of regulatory T cells in cancer outcomes warrants further consideration given that several groups are attempting to enhance tumor immunity by depleting FoxP3+ Tregs from cancer patients [39-44], including EOC patients [45].

In addition to Tregs, other cell types reportedly play an immunosuppressive role in EOC. For example, plasmacytoid dendritic cells contribute to immunosuppression by promoting the development or recruitment of interleukin-10-producing CD4+ and CD8+ regulatory T cells [46,47]. Myeloid dendritic cells (MDCs) impair T cell immunity by expressing B7-H1, a ligand for the inhibitory receptor PD-1 found on T cells [48]. Monocytes and macrophages in the EOC microenvironment can be polarized toward a so-called M2 phenotype, which is typified by the expression of IL-10, TGF- $\beta$  and scavenger receptors and is thought to promote tumor progression [49,50,51]. Under the influence of IL-6 and IL-10, macrophages in EOC can also express B7-H4, which inhibits T cell proliferation [52]. Macrophages also produce CCL22, which promotes Treg recruitment to the tumor environment [32]. Finally, expression of the inflammatory mediator COX-2 in tumor epithelium has been associated with reduced lymphocyte infiltration and poor prognosis in EOC [13,53].

With the advent of tumor tissue microarray (TMA) technology, a large number of retrospective studies have investigated the relationship between tumor-infiltrating immune cells and prognosis in EOC and other cancers. However, most studies focus on one or a few markers, such that associations between different immunological factors may be missed. Additionally most studies fail to address the different histological subtypes of EOC, which are now recognized to behave as distinct diseases [54]. As a result, there are inconsistencies and unresolved issues in the literature concerning the prognostic significance of different immune cell infiltrates. To address this, we analyzed several large series of EOC tumors, including high-grade serous, endometrioid, clear cell and mucinous subtypes, for the presence of various immune cell infiltrates and inflammatory markers. Our results reveal that high-grade serous tumors have a distinct immunological profile that is strongly associated with patient survival.

## Results

### Intraepithelial T cells and associated functional markers in high-grade serous EOC

We initially investigated the relationship between immune infiltrates and survival in a cohort of 199 high-grade serous EOC patients. We chose to first focus on high-grade serous cases, as the other histological subtypes exhibit distinct biological and clinical properties that are potentially confounding [54,55]. This initial cohort was restricted to patients who had undergone optimal cytoreduction (i.e., without evidence of macroscopic residual disease). Patient characteristics are shown in Table 1.

The tumors in this initial cohort had been previously assessed by immunohistochemistry (IHC) for a variety of lymphocyte markers, including CD3, CD4, CD8, CD20 and Granzyme B [12]. Intraepithelial lymphocytes (i.e., lymphocytes within the epithelial component of the tumor) were scored as either present (i.e. one or more intraepithelial lymphocytes present in at least one of two 0.6 mm cores) or absent. We re-analyzed this data focusing exclusively on high-grade serous cases. We found that 83.2% (163/196) of evaluable high-grade serous tumors were positive for intraepithelial CD3+ T cells, whereas CD4+ and CD8+ intraepithelial cells were found in 53.4% (103/193) and 84.0% (163/194) of evaluable tumors, respectively (Fig. 1A&B and data not shown). CD4+ and CD8+ cellular infiltrates showed a strong positive association

**Table 1.** Clinical characteristics of the optimally debulked high-grade serous EOC patient cohort.

|                                           |             |
|-------------------------------------------|-------------|
| <b>Age at surgery (years)</b>             |             |
| Mean                                      | 61.00       |
| Std dev                                   | 11.48       |
| Range                                     | 37.59-85.96 |
| Median                                    | 60.08       |
| <b>* Overall Survival (years)</b>         |             |
| Mean                                      | 5.59        |
| Std dev                                   | 3.47        |
| Range                                     | 0.4-17.4    |
| Median                                    | 4.91        |
| <b>Silverberg Grade</b>                   |             |
| 1                                         | 0           |
| 2                                         | 56          |
| 3                                         | 143         |
| Unknown                                   | 0           |
| <b>Stage</b>                              |             |
| I                                         | 49          |
| II                                        | 85          |
| III                                       | 65          |
| IV                                        | 0           |
| Unknown                                   | 0           |
| <b>Total number of evaluable patients</b> | <b>199</b>  |

\*There were no deaths due to causes other than ovarian cancer, therefore disease-specific and overall survival were equivalent.  
doi:10.1371/journal.pone.0006412.t001

( $p < 0.0001$ ). Table 2 shows statistical associations for these and all other markers studied in this initial cohort.

While the above markers indicate which lymphocyte subsets are present in tumors, they do not reveal their activation state. To address this issue, we analyzed tumors for expression of CD45RO, OX40 and CD25, which are expressed by activated T cells [56,57]. Using the same scoring criteria as above, 70.6% (132/187) of tumors were positive for intraepithelial CD45RO+ cells, and 49.7% (96/193) were positive for intraepithelial CD25+ cells (Fig. 1C&E). By contrast, only 7.0% (11/158) of tumors were positive for intraepithelial OX40+ cells (Fig. 1D). In pair-wise comparisons, CD45RO, CD25 and OX40 were all positively associated (Table 2). Moreover, CD45RO and CD25 were both associated with the presence of CD3+, CD4+ and CD8+ cells. OX40 showed a similar trend, but this did not reach statistical significance, likely due to the low number of positive cases.

To investigate the differentiation state of tumor-infiltrating T cells, tissues were analyzed for intraepithelial cells expressing TIA-1 and Granzyme B, which are markers of CD8+ cytotoxic T cells and NK cells [58-60]. A majority of tumors (66.5%, 127/191) were positive for intraepithelial TIA-1+ cells (Fig. 1F), and about half of tumors (45.6%, 88/193) were positive for intraepithelial Granzyme B+ cells (Fig. 1G). There was a highly significant association between TIA-1+ and Granzyme B+ cells ( $p < 0.0001$ ). Moreover, in pair-wise comparisons, TIA-1+ and Granzyme B+ cells were each associated with the activation markers CD45RO, CD25 and OX40. Finally, TIA-1+ and Granzyme B+ cells were each associated with the presence of CD3+, CD4+ and CD8+ cells (Table 2). To examine whether TIA-1 and Granzyme B

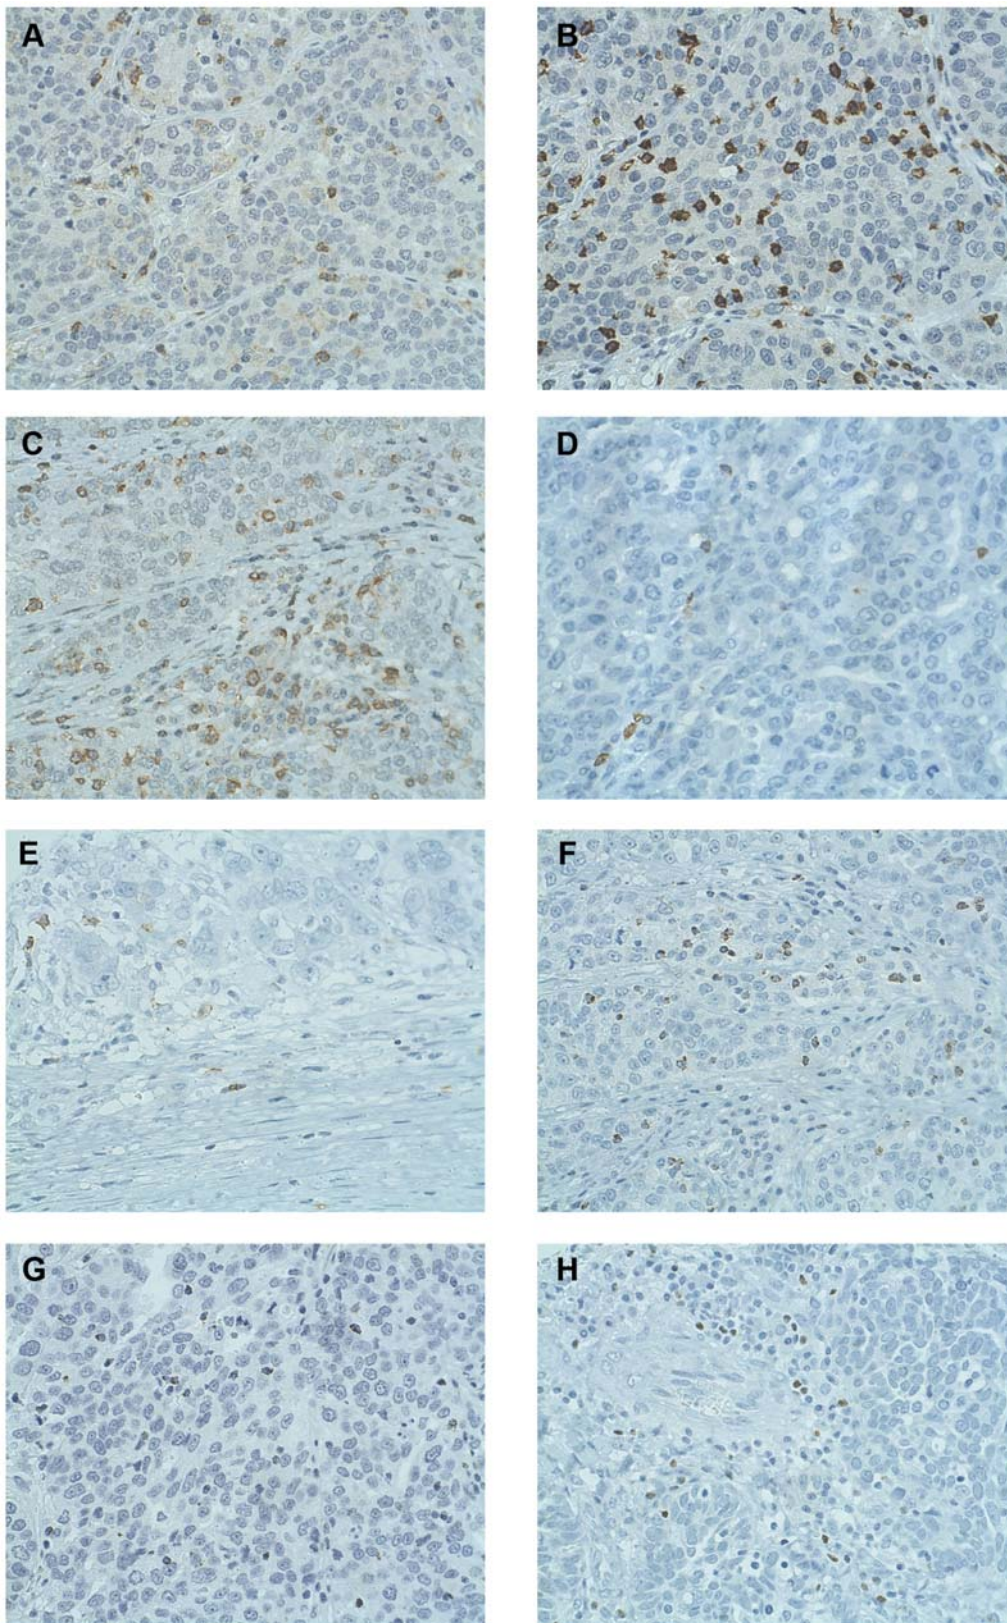

**Figure 1. Immunohistochemical analysis of high-grade serous EOC tumors showing infiltrates expressing markers of T cell differentiation and activation.** (A) CD4, (B) CD8, (C) CD45RO, (D) OX40, (E) CD25, (F) TIA-1, (G) Granzyme B, and (H) FoxP3. 40X objective. doi:10.1371/journal.pone.0006412.g001

**Table 2.** *p*-values for Chi-square tests of associations between immunohistochemical markers in the optimally debulked high-grade serous EOC cohort.

|                     | CD3     | CD8     | CD4     | CD45RO  | CD25    | OX40   | TIA-1   | GrB <sup>1</sup> |
|---------------------|---------|---------|---------|---------|---------|--------|---------|------------------|
| CD3                 |         | <0.0001 | <0.0001 | <0.0001 | <0.0001 | 0.16   | <0.0001 | <0.0001          |
| CD8                 | <0.0001 |         | <0.0001 | <0.0001 | <0.0001 | 0.15   | <0.0001 | <0.0001          |
| CD4                 | <0.0001 | <0.0001 |         | 0.0021  | <0.0001 | 0.049  | 0.0013  | 0.0001           |
| CD45RO              | <0.0001 | <0.0001 | 0.0021  |         | <0.0001 | 0.031  | <0.0001 | <0.0001          |
| CD25                | <0.0001 | <0.0001 | <0.0001 | <0.0001 |         | 0.0040 | <0.0001 | <0.0001          |
| OX40                | 0.16    | 0.15    | 0.049   | 0.031   | 0.0040  |        | 0.012   | 0.044            |
| TIA-1               | <0.0001 | <0.0001 | 0.0013  | <0.0001 | <0.0001 | 0.012  |         | <0.0001          |
| GrB <sup>1</sup>    | <0.0001 | <0.0001 | 0.0001  | <0.0001 | <0.0001 | 0.044  | <0.0001 |                  |
| FoxP3               | <0.0001 | <0.0001 | <0.0001 | <0.0001 | <0.0001 | 0.47   | <0.0001 | <0.0001          |
| MHC I <sup>2</sup>  | <0.0001 | <0.0001 | <0.0001 | <0.0001 | <0.0001 | 0.18   | <0.0001 | 0.0001           |
| MHC II <sup>3</sup> | 0.0078  | 0.0009  | 0.013   | 0.0004  | 0.0001  | 0.38   | 0.0006  | 0.016            |
| CD20                | <0.0001 | <0.0001 | 0.0006  | 0.0036  | 0.0006  | 0.13   | <0.0001 | <0.0001          |
| CD1a                | 0.11    | 0.096   | 0.046   | 0.21    | 0.27    | 0.030  | 0.31    | 0.48             |
| CD68                | <0.0001 | 0.0001  | 0.0028  | 0.0019  | 0.0006  | 0.23   | 0.0005  | 0.0007           |
| MPO <sup>4</sup>    | 0.89    | 0.53    | 0.034   | 0.90    | 0.78    | 0.33   | 0.67    | 0.49             |
| COX-2 <sup>5</sup>  | 0.75    | 0.64    | 0.55    | 0.64    | 0.74    | 0.76   | 0.42    | 0.70             |

  

|                     | FoxP3   | MHC I <sup>2</sup> | MHC II <sup>3</sup> | CD20    | CD1a  | CD68    | MPO <sup>4</sup> | COX2 <sup>5</sup> |
|---------------------|---------|--------------------|---------------------|---------|-------|---------|------------------|-------------------|
| CD3                 | <0.0001 | <0.0001            | 0.0078              | <0.0001 | 0.11  | <0.0001 | 0.89             | 0.75              |
| CD8                 | <0.0001 | <0.0001            | 0.0009              | <0.0001 | 0.096 | 0.0001  | 0.53             | 0.64              |
| CD4                 | <0.0001 | <0.0001            | 0.013               | 0.0006  | 0.046 | 0.0028  | 0.034            | 0.55              |
| CD45RO              | <0.0001 | <0.0001            | 0.0004              | 0.0036  | 0.21  | 0.0019  | 0.90             | 0.64              |
| CD25                | <0.0001 | <0.0001            | 0.0001              | 0.0006  | 0.27  | 0.0006  | 0.78             | 0.74              |
| OX40                | 0.47    | 0.18               | 0.38                | 0.13    | 0.030 | 0.23    | 0.33             | 0.76              |
| TIA-1               | <0.0001 | <0.0001            | 0.0006              | <0.0001 | 0.31  | 0.0005  | 0.67             | 0.42              |
| GrB <sup>1</sup>    | <0.0001 | 0.0001             | 0.016               | <0.0001 | 0.48  | 0.0007  | 0.49             | 0.70              |
| FoxP3               |         | <0.0001            | <0.0001             | 0.0009  | 0.35  | 0.0001  | 0.42             | 0.82              |
| MHC I <sup>2</sup>  | <0.0001 |                    | <0.0001             | 0.0015  | 0.13  | 0.035   | 0.61             | 0.17              |
| MHC II <sup>3</sup> | <0.0001 | <0.0001            |                     | 0.023   | 0.11  | 0.22    | 0.39             | 0.30              |
| CD20                | 0.0009  | 0.0015             | 0.023               |         | 0.87  | 0.029   | 0.60             | 0.13              |
| CD1a                | 0.35    | 0.13               | 0.11                | 0.87    |       | 0.52    | 0.046            | 0.84              |
| CD68                | 0.0001  | 0.035              | 0.22                | 0.029   | 0.52  |         | 0.43             | 0.30              |
| MPO <sup>4</sup>    | 0.42    | 0.61               | 0.39                | 0.60    | 0.046 | 0.43    |                  | 0.51              |
| COX-2 <sup>5</sup>  | 0.82    | 0.17               | 0.30                | 0.13    | 0.84  | 0.30    | 0.51             |                   |

<sup>1</sup>GrB = Granzyme B.<sup>2</sup>MHC I = MHC class I.<sup>3</sup>MHC II = MHC class II.<sup>4</sup>MPO = myeloperoxidase.<sup>5</sup>COX-2 = Cyclooxygenase-2.

doi:10.1371/journal.pone.0006412.t002

expression could be due to the presence of NK or NKT cells, we examined tumors for the NK cell markers CD56 and CD57. For both markers, there were either few or no infiltrates at all within the tumor epithelium (data not shown), indicating that the TIA-1+ and Granzyme B+ infiltrates were most likely T cells.

Finally, tumors were analyzed for the presence of intraepithelial cells expressing FoxP3, which in humans is a marker of regulatory T cells and activated T cells [61,62]. About half of tumors (52.9%, 100/189) were positive for intraepithelial FoxP3+ cells (Fig. 1H). There was a strong association between FoxP3+ and CD25+ cells ( $p < 0.0001$ ), and FoxP3+ and CD25+ cells were each strongly

associated with CD4+ cells ( $p < 0.0001$  for both markers). Thus, consistent with previous reports [10,14,27,28], a significant proportion of tumors contained intraepithelial infiltrates with markers characteristic of Tregs (CD4+, CD25+, and FoxP3+).

#### MHC class I and II in high-grade serous EOC

We analyzed tumor cells for expression of MHC class I and II using a four-point scale (negative, focal [ $< 10\%$ ], patchy [ $10\text{--}50\%$ ] or diffuse [ $> 50\%$ ]). All evaluable tumors (185/185) expressed MHC class I to some degree (i.e., focal, patchy or diffuse), indicating they could theoretically present antigen to CD8+ T cells. For

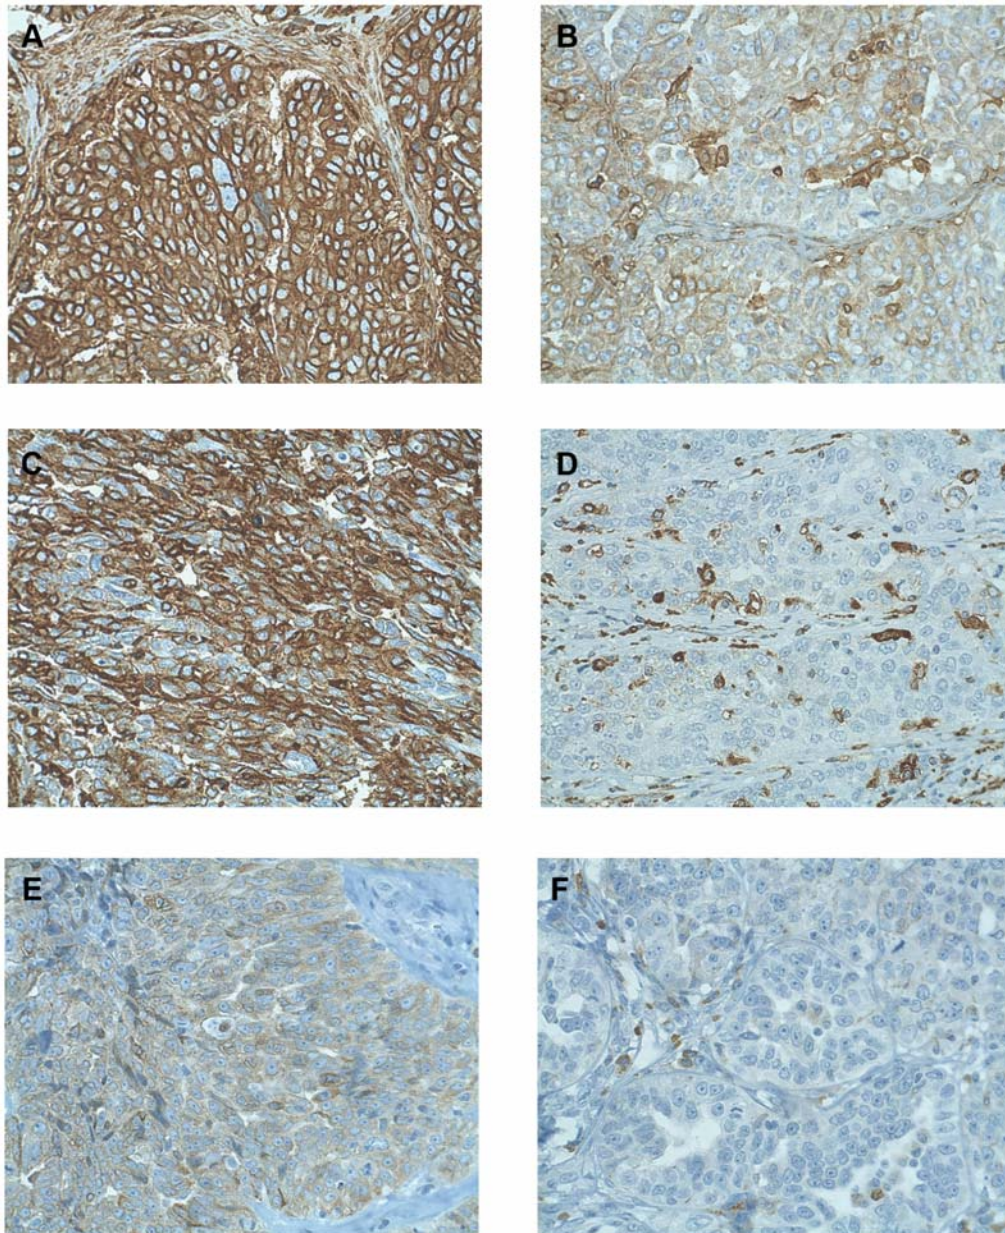

**Figure 2. Immunohistochemical analysis of high-grade serous EOC tumors showing (A,B) high and low expression of MHC class I, (C,D) high and low expression of MHC class II, and (E,F) high and low expression of COX-2. 40X objective.**  
doi:10.1371/journal.pone.0006412.g002

statistical analyses, only the highest category (diffuse, >50%) was considered positive (Fig. 2A&B). Using this threshold, 85.4% (158/185) of tumors were positive for MHC class I. MHC class I was positively associated with all three T cell subsets (CD3, CD4, and CD8), the activation markers CD45RO and CD25, and the differentiation markers TIA-1, Granzyme B and FoxP3 (Table 2).

A large majority of tumors (86.5%, 166/192) expressed MHC class II to some degree (i.e., focal, patchy or diffuse), indicating they could theoretically present antigen to CD4+ T cells. As with MHC class I, only the highest category (diffuse, >50%) was considered positive for statistical analyses (Fig. 2 C&D). Using this threshold, 41.1% (79/192) of tumors were positive for MHC class II. MHC class II was strongly associated with MHC class I ( $p < 0.0001$ ). Accordingly, MHC class II was positively associated with all three T cell subsets (CD3, CD4, and CD8), the activation markers CD45RO

and CD25, and the differentiation markers TIA-1, Granzyme B and FoxP3 (Table 2). Similar to the results for MHC class I, the expression of MHC class II in tumor epithelium was positively associated with various T cell markers, including CD3, CD4, CD8, CD45RO, TIA-1, Granzyme B, CD25 and FoxP3 (Table 2).

#### Intraepithelial B cells in high-grade serous EOC

Tissues were stained with an antibody to CD20, which is expressed by B cells from the naïve to memory stages of differentiation [63]. Intraepithelial CD20+ cells were found in 41.9% (83/198) of evaluable tumors (Fig. 3A). CD20+ infiltrates were strongly associated with all three T cell subsets (CD3, CD4, and CD8); the activation markers CD45RO and CD25; the differentiation markers TIA-1, Granzyme B and FoxP3; and both MHC class I and II (Table 2).

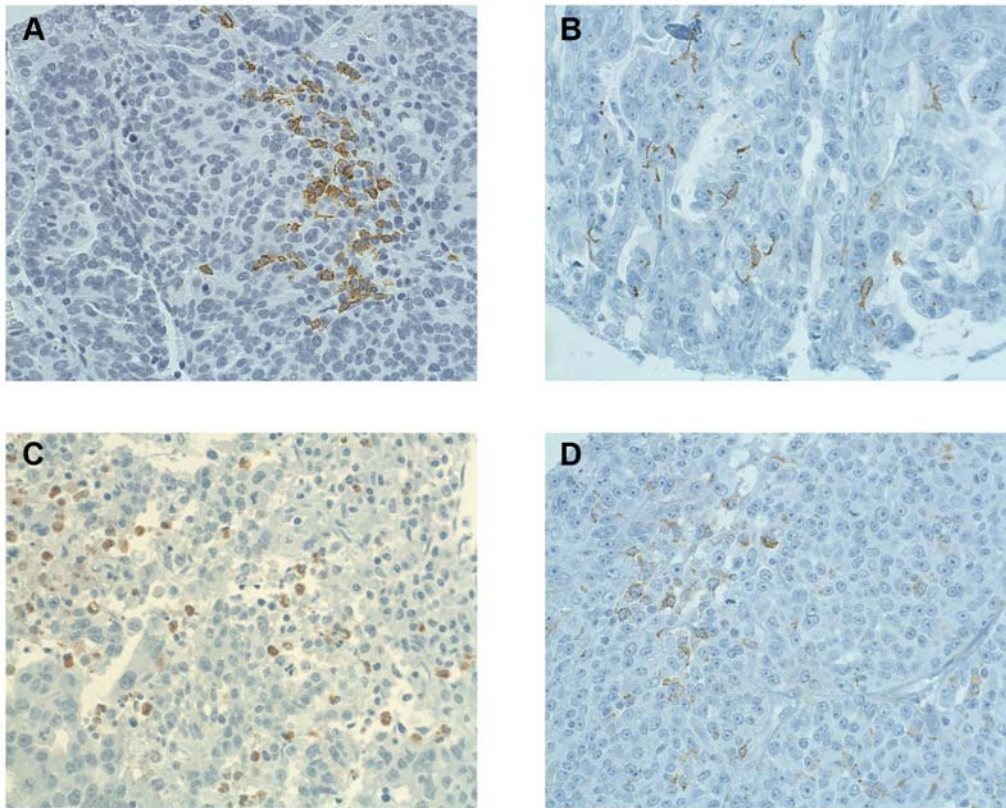

**Figure 3. Immunohistochemical analysis of high-grade serous EOC tumors showing infiltrates expressing (A) CD20 (B cells), (B) CD1a (immature DCs), (C) Myeloperoxidase (granulocytes), and (D) CD68 (macrophages). 40X objective.**  
doi:10.1371/journal.pone.0006412.g003

### Intraepithelial dendritic cells, granulocytes and macrophages in high-grade serous EOC

Tumors were analyzed for the presence of immature and mature dendritic cells by staining for CD1a and CD208, respectively. A minority of tumors (13.4%, 23/172) contained intraepithelial CD1a+ cells (Fig. 3B). No significant association with any of the intraepithelial lymphocyte markers (CD3, CD8 or CD20), activation markers (CD45RO or CD25), differentiation markers (TIA-1, Granzyme B or FoxP3) or MHC class I or II (Table 2) was seen, potentially due to the low number of CD1a+ cells. In contrast to CD1a, none of the tumors scored positive for intraepithelial CD208+ cells. Parallel analysis of tonsil tissue revealed the presence of many CD208+ cells, thereby validating the IHC procedure.

About half of tumors (54.7%, 87/159) contained intraepithelial cells expressing the macrophage marker CD68 (Fig. 3D). CD68 was positively associated with several lymphocyte markers (CD3, CD8 and CD20), activation markers (CD45RO and CD25), differentiation markers (TIA-1, Granzyme B and FoxP3) and MHC class I (Table 2). To assess the presence of granulocytes, the TMA was stained for myeloperoxidase. Twenty four percent (37/154) of tumors contained myeloperoxidase-expressing cells (Fig. 3C), however these showed no significant associations with other markers, with the exception of CD4 ( $p = 0.034$ ).

The COX-2 enzyme has been associated with inferior survival in EOC when expressed in the epithelial component of the tumor [53]. Therefore, tumors were scored for expression of COX-2 in the epithelial component using a four-point scale (negative, equivocal [0-1%], patchy [1-50%] or diffuse [>50%]) (Fig. 2E&F). Two-thirds of tumors (66.5%, 111/167) were positive

for COX-2 (i.e., patchy or diffuse staining). In contrast to reports in ovarian, cervical, and other cancers, [13,64,65], the expression of COX-2 was not significantly associated with any of the immune infiltrates studied (Table 2).

### Associations between immune infiltrates and patient survival in high-grade serous EOC

Kaplan-Meier analysis was performed to assess the association between various immune infiltrates and disease-specific survival (DSS). Consistent with prior reports [5-7,10-17], intraepithelial CD3+ and CD8+ cells were associated with increased DSS ( $p = 0.0009$  and  $0.0008$  respectively) (Fig. 4A&B). Intraepithelial CD4+ cells showed a trend towards increased DSS, but this was not statistically significant (Fig. 4C). The NK cell markers CD56 and CD57 showed no association with DSS (data not shown).

Intriguingly, intraepithelial CD20+ cells were associated with increased DSS ( $p = 0.0033$ ) (Fig. 4E). Furthermore, the combination of CD8+ and CD20+ infiltrates was associated with significantly increased DSS over tumors that contained CD8+ infiltrates but not CD20+ infiltrates (median 4432 days vs. 2279 days,  $p = 0.0115$ ) (data not shown).

In contrast to lymphocyte markers, the dendritic cell marker CD1a showed no association with DSS, possibly due to the low number of tumors containing CD1a+ cells. Likewise, the markers CD68, COX-2 and myeloperoxidase showed no association with DSS (Fig. 4F and data not shown).

Given the association between CD8+ T cells and DSS, we evaluated other canonical features of active CTL responses. DSS was positively associated with intraepithelial TIA-1+ cells ( $p = 0.0003$ ), as well as expression of MHC class I and II by

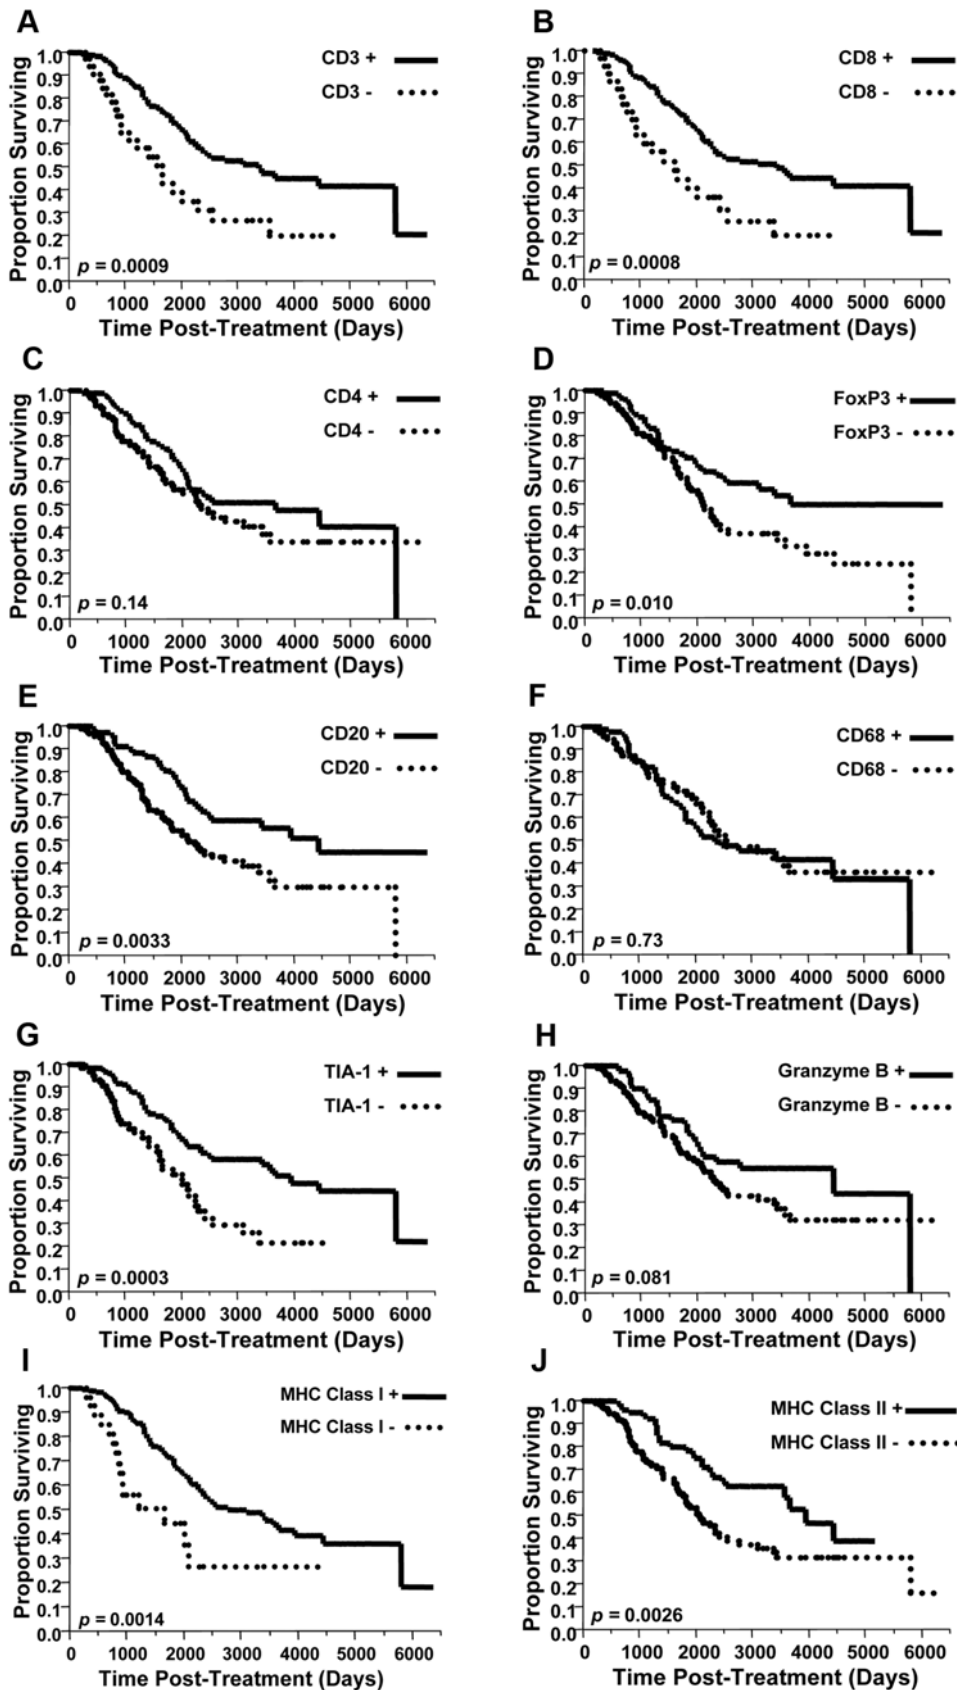

**Figure 4. Immune infiltrates and survival in ovarian cancer.** Kaplan-Meier curves showing disease-specific survival for patients scored as positive or negative for (A) CD3, (B) CD8, (C) CD4, (D) FoxP3, (E) CD20, (F) CD68, (G) TIA-1, (H) Granzyme B, (I) MHC Class I and (J) MHC Class II. Data were derived from optimally debulked patients with high-grade serous EOC. doi:10.1371/journal.pone.0006412.g004

tumor cells ( $p=0.0014$  and  $0.0026$  respectively) (Fig. 4G,I,&J). Tumors that contained both CD8+ and TIA-1+ infiltrates were associated with increased DSS compared to CD8+ TIA-1-negative tumors ( $p=0.0025$ ). Several other T cell markers, including Granzyme B, CD45RO and CD25, showed trends toward increased DSS but did not reach statistical significance (Fig. 4H and data not shown). OX-40 showed no apparent trend or association with DSS, possibly due to low numbers of positive cases (data not shown).

In apparent contrast to reports that regulatory T cells are associated with poor prognosis, the presence of intraepithelial FoxP3+ cells was associated with increased DSS ( $p=0.010$ ) (Fig. 4D). Moreover, tumors that were triply positive for intraepithelial CD4+, FoxP3+ and CD25+ cells showed a trend towards increased survival, although this fell short of statistical significance ( $p=0.059$ ). Likewise, tumors positive for both intraepithelial CD8+ and FoxP3+ cells showed a trend toward increased DSS compared to tumors that were positive for CD8+ cells but negative for FoxP3+ cells; however, this trend did not reach statistical significance ( $p=0.052$ ). Thus, by multiple analyses, tumor-infiltrating FoxP3+ cells showed a trend or statistically significant association with increased DSS.

#### The association between immune infiltrates and survival is dependent on the extent of residual disease

T cell infiltrates are reportedly more prevalent in patients with optimal versus suboptimal cytoreduction [5,66]. To investigate whether this was true for other lymphocyte markers, we analyzed an additional cohort of 220 high-grade serous cases from patients known to have macroscopic residual disease following primary cytoreductive surgery. We focused on CD8+ infiltrates, as well as the three novel prognostic markers from the preceding analysis (i.e., FoxP3, TIA-1 and CD20). Compared to the optimally debulked patient cohort, patients with macroscopic residual disease had a

significantly lower prevalence of CD8+ (58.5%), FoxP3+ (20.2%), TIA-1+ (39.5%) and CD20+ (16.3%) infiltrates ( $p<0.0001$  for all markers). In Kaplan-Meier analysis of these four markers, only CD8+ infiltrates had a significant association with survival ( $p=0.0044$ ) in patients with macroscopic residual disease (data not shown).

#### The association between immune infiltrates and survival is dependent on histological subtype

The preceding results were based exclusively on high-grade serous EOC cases. To assess the association between immune infiltrates and DSS in other histological subtypes of EOC, we performed the same analyses using an additional 288 EOC tumors of the following histological subtypes: mucinous ( $n=31$ ), endometrioid ( $n=125$ ) and clear cell ( $n=132$ ). These additional tumor specimens were from a previously described cohort of optimally debulked patients [12].

In general, immune infiltrates were less prevalent in the other histological subtypes compared to the high-grade serous cases discussed previously. This was true for all lymphocyte markers studied (i.e., CD3, CD8, CD4, CD45RO, CD25, FoxP3, TIA-1, Granzyme B, and CD20) (Fig. 5). The difference was most striking for the markers FoxP3, CD25 and CD20. After the high-grade serous cases, the next highest frequency of immune infiltrates was seen in the endometrioid subtype (Fig. 5).

We examined the association between immune infiltrates and DSS in the endometrioid and clear cell subtypes; the number of mucinous cases was too small to perform robust statistical analysis. For endometrioid cases, the only significant association found was between MHC class II expression and increased DSS ( $p=0.039$ ) (data not shown). For clear cell cases, the only significant association found was between the presence of myeloperoxidase-positive infiltrates and decreased DSS ( $p=0.040$ , data not shown). Thus, the relationship between immune infiltrates and survival differs greatly between histological subtypes of EOC.

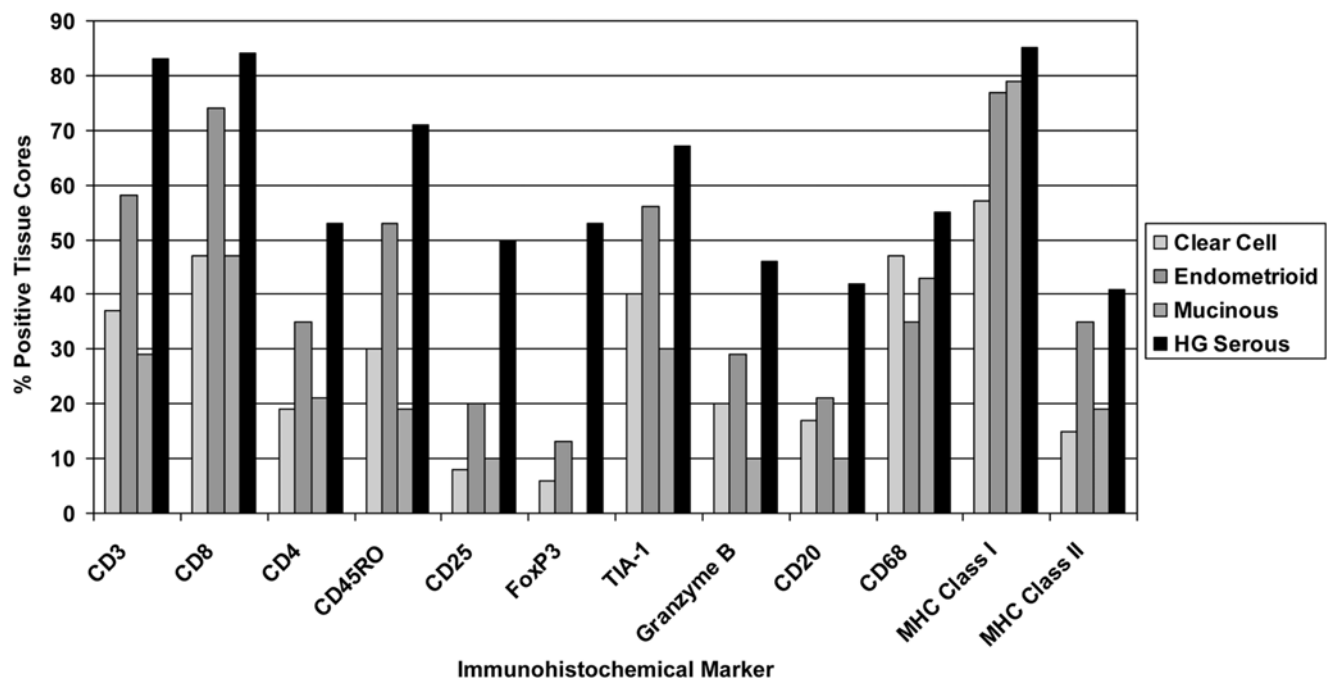

**Figure 5. Prevalence of immune infiltrates and other markers across different histologic subtypes of EOC.** Bars indicate the percentage of tumors scoring positive for intrapithelial cells expressing CD3, CD8, CD4, CD45RO, CD25, FoxP3, TIA-1, Granzyme B, CD20 and CD68. Expression of MHC class I and II by tumor epithelium is also shown. Data were derived from optimally debulked patients. doi:10.1371/journal.pone.0006412.g005



## Discussion

We systematically examined the relationship between immune infiltrates and patient survival in three large EOC series. In accord with Clarke et al. [12], we found that high-grade serous tumors have a distinct immunological profile compared to the endometrioid, clear cell and mucinous subtypes. Furthermore, we found that immune infiltrates were generally more prevalent in tumors from patients with optimal cytoreduction. FoxP3, TIA-1 and CD20 emerged as novel immunological markers associated with increased patient survival. Our results highlight the importance of histological subtype in the immunobiology of EOC, which may have important implications for the immunotherapy of this family of diseases.

Intraepithelial lymphocytes (i.e., cells expressing CD3, CD4, CD8, FoxP3 or CD20) were more prevalent in high-grade serous cases, followed by endometrioid cases. Moreover, intraepithelial lymphocytes were more prevalent in tumors from optimally debulked patients compared to patients with macroscopic residual disease. A number of biological features of tumors appear to influence the density of lymphocytic infiltrates. (a) T cell infiltrates are positively associated with expression of MHC class I and II by tumor cells (Table 2), as well as MHC class I antigen processing machinery [15-17,67], suggesting that antigen presentation may be an important determinant of T cell infiltration. (b) In accord with this notion, tumors with loss or mutation of the BRCA1 or p53 genes have an increased density of tumor-infiltrating T cells [12,66]. This suggests that defective DNA repair and the ensuing genomic instability in tumors may lead to the generation of neoantigens that trigger host T cell responses. (c) Signaling molecules also play a role, as the density of tumor-infiltrating T cells is negatively associated with expression of VEGF, B7-H1/PD-L1 and endothelin B receptor by tumors [5,11,68] and positively associated with expression of the chemokines CXCL9, CCL21, CCL22, CCL2 and CCL5 [5,28,69]. (d) Finally, two groups have reported gene expression profiles that correlate with the presence of tumor-infiltrating T cells in EOC [12,70]. These latter studies confirm some of the above associations (e.g., MHC class I and II, beta 2 microglobulin, TAP1 and 2) and identify new factors associated with T cell infiltrates (e.g., IL-15, IL-32 and numerous interferon-induced genes). Presumably one or more of the above factors accounts for the observed enrichment of tumor-infiltrating lymphocytes in high-grade serous and optimally cytoreduced cases.

Although the association between intraepithelial CD8+ T cells and increased survival in EOC is a highly reproducible finding [10-17], relatively little is known about the functional phenotype of these CD8+ T cells. Several lines of evidence suggest a classic cytolytic response underlies favorable outcomes. For example, others have reported positive associations between survival and intratumoral expression of IFN- $\gamma$  [18,19], the IFN- $\gamma$  receptor [20], as well as numerous interferon-responsive genes such as MHC class I [24-26], MHC class I antigen processing machinery [17], MHC class II [15,16], and IRF-1 [21]. IL-18 [22] and TNF- $\alpha$  [23] also appear to be important components of the T cell response, as both cytokines are positively associated with survival. We examined two components of cytolytic granules, Granzyme B and TIA-1, both of which showed an association with CD8+ T cell infiltrates. Of these two markers, only TIA-1 showed a statistically significant association with survival in high-grade serous cases (Fig. 4). TIA-1+ cells have also been described in medullary breast cancer [71,72] and melanoma [73], where they are associated with favorable prognostic features. By contrast, tumor-infiltrating TIA-1+ cells are associated with decreased survival in lymphoma [74-

78]. Interestingly, TIA-1 is not simply a marker of cytolytic granules; it is an RNA binding protein involved in post-transcriptional mRNA regulation [79]. It remains to be determined whether the association between intraepithelial TIA-1+ cells and survival in EOC is due to the role of this protein in cytolytic granule function or mRNA regulation.

Treg infiltrates have previously been associated with decreased survival in ovarian EOC [10,27,28]. However, in the present study and one other recent report [14], FoxP3+ infiltrates were associated with increased survival. These seemingly contradictory findings may be attributable to several factors. First, not all studies take into consideration the histological subtypes of EOC, or the extent of residual disease; in the present study, FoxP3+ cells were only associated with survival in high-grade serous tumors from optimally debulked patients. Second, a variety of antibodies have been used to detect FoxP3, which can lead to discordant results [80]. Third, different scoring criteria may be used. For example, the precise intratumoral location of Tregs is an important determinant of prognosis in gastric cancer [81]. Fourth, the molecular markers used to define Tregs differ between studies. Although FoxP3 is still regarded as the most reliable marker of Tregs in human cancer [82,83], it can also be expressed by epithelial tumor cells [84-86] and *in vitro* activated CD4+ and CD8+ T cells [87-95]. For these reasons, some studies include CD25 as a second marker of Tregs [10,28]. However, like FoxP3, CD25 is potentially expressed by effector T cells, so it is not clear that dual staining for FoxP3 and CD25 more accurately identifies Tregs [89,96]. Other characteristics of Tregs include high expression of GITR and CTLA-4 and low expression of CD127 and CD49d and [97,98], however these markers are technically difficult to assess on paraffin-embedded TMAs.

These technical considerations notwithstanding, there is mounting evidence that tumor-infiltrating FoxP3+ cells are associated with a favorable prognosis in EOC, colorectal cancer, head and neck cancer, and lymphoma [14,33,-36,99-102]. How might FoxP3+ T cells promote favorable outcomes? In the present study, FoxP3+ cells were strongly associated with other effector T cells, and similar results have been reported in melanoma [103]. Thus, FoxP3+ cells may simply be an indicator of a strong CD8+ T cell response, which might outweigh any immunosuppressive effects of FoxP3+ cells. Alternatively, subsets of human FoxP3+ T cells have recently been shown to have a pro-inflammatory, IL-17-producing phenotype [104-106]. Indeed, CD4+ T cells can be skewed toward this so-called Th17 phenotype by exposure to TGF- $\beta$  in combination with IL-6, IL-1 or IL-23 [107-109]. These factors are present in the EOC tumor environment [8], and accordingly, Th17 cells have been reported in EOC [110-112]. Thus, the association between FoxP3+ cells and increased survival could potentially reflect an underlying Th17-like anti-tumor response. Clearly, more work is required to determine the extent to which FoxP3+ T cells in EOC represent Tregs versus Th17 or other effector T cells.

The observation that intraepithelial CD20+ infiltrates are associated with increased DSS is a novel finding in EOC. Dong et al. reported that B cells in ascites were associated with shorter survival in EOC [113], however their study focused on B cells in peritoneal and pleural effusions collected after chemotherapy, which by definition constitutes a poor outcome cohort. Indeed, in the present study, intraepithelial CD20+ B cells showed no association with survival in patients with high-risk, suboptimally debulked disease. Tumor-infiltrating CD20+ B cells are a hallmark of medullary breast cancer and have been proposed to mediate a favorable prognosis [114,115]. Moreover, the presence of a B cell transcriptional signature in node-negative breast cancer is

associated with increased survival [116]. B cell infiltrates in breast cancer represent clonally expanded populations, express somatically hypermutated IgG molecules, and recognize target antigens such as ganglioside D3 and surface-translocated actin [114,115,117-120]. It is unclear how tumor-infiltrating B cells promote favorable outcomes in cancer. In theory, their actions could be mediated by secreted antibodies, which can promote the opsonization of tumor antigens, complement-mediated destruction of tumor cells, or antibody-dependent cellular cytotoxicity. Apart from producing antibodies, B cells can also present antigen to both CD4+ and CD8+ T cells [121-131]. In this regard, it is noteworthy that ovarian tumors show low numbers of CD1a+ dendritic cells; perhaps CD20+ B cells serve as alternative antigen presenting cells in the tumor environment. This latter idea fits well with the observed co-localization of tumor-infiltrating B cells and CD8+ T cells in EOC, as well as in medullary breast cancer, non-small cell lung cancer and cervical cancer [72,132-134].

The presence of macrophages has been associated with poor prognosis in various human cancers [135,136]. However, in accord with a prior report by Shah et al. [66], we found no association between CD68+ infiltrates and survival in EOC. Importantly, however, CD68 is not a perfect marker of macrophages, as it is also expressed by dendritic cells and some non-myeloid cells [137]. Furthermore, CD68 does not distinguish between macrophages polarized towards the pro-inflammatory (M1) or tumor-promoting (M2) phenotypes. M1 macrophages have the capacity to kill tumor cells, whereas M2 macrophages promote tissue repair and angiogenesis [136]. Similarly, an immunosuppressive subpopulation of macrophages has been described in EOC based on expression of the signaling molecule B7-H4 [52]. Thus, additional functional markers may be required to fully define the role of macrophages in the immunobiology of EOC.

While this study focused on the relationship between immune infiltrates and prognosis after standard treatments, the results may also inform the design of immunotherapies for EOC. First, our findings suggest that high-grade serous tumors may be especially sensitive to T cell responses. Second, our data indicates that, in patients with residual disease, the influence of T cells may be overwhelmed by other factors. Third, the positive association between intraepithelial FoxP3+ cells and survival reported here and previously [14] prompts a reconsideration of strategies to deplete regulatory T cells from EOC patients. And fourth, the association between intraepithelial CD20+ cells and survival suggests the humoral immune response may play an important role in anti-tumor immunity that could be exploited therapeutically in parallel with CD8+ T cell responses.

## Materials and Methods

### Study subjects

All specimens and clinical data were obtained with informed written consent under protocols approved by the Research Ethics Board of the BC Cancer Agency and the University of British Columbia. The main cohort used for this study consisted of 199 women with high-grade serous ovarian cancer seen at the BC Cancer Agency from 1984 to 2000 (OvCaRe Ovarian Tumour Bank, Vancouver, BC, Canada). Tumor tissue was obtained at the time of primary surgery prior to any other treatment. Patients had no macroscopic residual disease following surgical debulking. All patients underwent standard treatment consisting of surgery followed by standard platinum-based chemotherapy. Table 1 shows the general clinical characteristics of the 199-case cohort. We also analyzed a second cohort of mucinous (n = 31),

endometrioid (n = 125) and clear cell (n = 132) EOC cases. Patients in this cohort were also diagnosed from 1984 to 2000, were optimally cytoreduced, and received platinum-based chemotherapy. Finally, we analyzed a third cohort of 220 high-grade serous EOC patients categorized as extreme risk due to the presence of residual macroscopic disease. Patients in this cohort were treated from 1996 to 2000 and received platinum-based chemotherapy.

### Tumor specimens

Tumor tissue was obtained during primary cytoreductive surgery, fixed in 10% neutral buffered formalin, processed using standard procedures and embedded in paraffin. A tissue microarray (TMA) was constructed by taking duplicate 0.6 mm cores from representative regions of each tumor block after review of hematoxylin- and eosin-stained sections by a pathologist. TMAs were assembled using a Pathology Devices tissue arrayer (Westminster, MD).

### Immunohistochemistry

Immunohistochemistry for CD20, CD3, CD4, CD8 and Granzyme B was performed as described in Clarke et al. [12]. The remaining unstained slides were received at the Trev and Joyce Deeley Research Centre where immunohistochemistry was performed for CD45RO, TIA-1, FoxP3, CD25, OX-40, CD56, CD57, CD1a, CD208, myeloperoxidase, CD68, COX-2, MHC Class I and MHC Class II. Following deparaffinization, the slides were placed in a Ventana Discovery XT autostainer (Ventana, Tucson, AZ) for immunohistochemical staining. Ventana's standard CC1 protocol was used for antigen retrieval. Primary antibodies are listed in Table 3.

TMAs were incubated with primary antibodies for 60 minutes at room temperature, and the appropriate cross-adsorbed, biotinylated secondary antibody (Jackson ImmunoResearch, West Grove, PA) was applied for 32 minutes. Bound antibodies were detected using the DABMap kit (Ventana), counterstained with hematoxylin (Ventana), and coverslipped manually with Cytoseal-60 (Richard Allan, Kalamazoo, MI).

### Histopathological analysis

Immunostained TMAs were examined by a pathologist and scored using a variety of methods depending on the marker studied. For CD20, CD8, CD4, CD45RO, TIA-1, Granzyme B, CD25, OX40, CD1a, CD56, CD57, and myeloperoxidase, only cells residing within the epithelial compartment of the tumor were counted. FoxP3 was similarly scored within the epithelium but a stromal score was also obtained. Tumors were scored as 0 (no cells), 1 (1-5 cells), 2 (6-19 cells) or 3 (20+ cells); results were binarized as positive (IHC score 1, 2, or 3) or negative (IHC score 0). CD3 was scored as 0 (no cells present), 1 (cells present in stroma only), 2 (cells present in the epithelial compartment) or 3 (cells present in both the epithelial and stromal regions of the tumor); scores of 0 and 1 were reported as negative while a score of 2 or 3 was reported as positive. CD68 was scored as 0 (no cells present), 1 (luminal or stromal cells), 2 (scattered, <20 intraepithelial cells), or 3 (>20 intraepithelial cells), results were binarized in the same manner as CD3. COX-2 was scored as 0 (negative), 1 (equivocal, 0-1%), 2 (patchy, >1% to 50%) or 3 (diffuse, >50%) scores of 0 and 1 were reported as negative and scores of 2 or 3 were reported as positive. For MHC class I and II, samples were scored as 0 (negative), 1 (focal, <10%), 2 (patchy, 10-50%) or 3 (diffuse, >50%). Scores of 0, 1 or 2 were reported as negative and scores of 3 were reported as positive.

**Table 3.** Primary antibodies used for immunohistochemistry.

| Antigen                    | Clone                          | Supplier            | Source | Concentration |
|----------------------------|--------------------------------|---------------------|--------|---------------|
| CD3                        | Polyclonal                     | Cell Marque         | Rabbit | 1/300         |
| CD8                        | C8/144C                        | DAKO                | Rabbit | 1/50          |
| CD4                        | 4B12                           | Novocastra          | Mouse  | 1/50          |
| Granzyme B                 | GrB-7                          | DAKO                | Mouse  | 1/25          |
| CD45RO                     | UCHL-1                         | Lab Vision          | Mouse  | 1/300         |
| TIA-1                      | TIA-1                          | Abcam               | Mouse  | 1/50          |
| FoxP3                      | eBio7979                       | eBioscience         | Mouse  | 1/50          |
| CD25                       | 4C9                            | Lab Vision          | Mouse  | 1/40          |
| OX-40 (CD134)              | ACT35                          | BD Pharmingen       | Mouse  | 1/50          |
| CD20                       | L26                            | DAKO                | Mouse  | 1/250         |
| CD56                       | 123C3.D5                       | Lab Vision          | Mouse  | 1/50          |
| CD57                       | NK1                            | Lab Vision          | Mouse  | 1/200         |
| CD1a                       | O10                            | Lab Vision          | Mouse  | 1/50          |
| CD208                      | 1010E1.01                      | Imgenix             | Rat    | 1/50          |
| Myeloperoxidase            | Polyclonal, Catalogue # RB-373 | Lab Vision          | Rabbit | 1/200         |
| CD68                       | PG-M1                          | Lab Vision          | Mouse  | 1/50          |
| Cyclooxygenase-2 (COX-2)   | SP21                           | Cell Marque         | Rabbit | 1/10          |
| MHC class I (A, B, C)      | EMR8-5                         | MBL                 | Mouse  | 1/500         |
| MHC class II (DR, DP & DQ) | CR3/43                         | Affinty BioReagents | Mouse  | 1/50          |

doi:10.1371/journal.pone.0006412.t003

### Statistical analysis

Statistical analysis was performed using JMP statistical software (v7.0) (SAS Institute, Cary, NC). Univariate analysis was carried out using the Chi-Squared statistic. The log-rank test was used to compare Kaplan-Meier curves. *p*-values less than 0.05 were considered significant.

### Acknowledgments

We thank Jennifer Santos, Erika Mehl, Rob Grigor, and members of the Deeley Research Centre for assistance and advice.

### References

- Ozols RF, Bundy BN, Greer BE, Fowler JM, Clarke-Pearson D, et al. (2003) Phase III trial of carboplatin and paclitaxel compared with cisplatin and paclitaxel in patients with optimally resected stage III ovarian cancer: a Gynecologic Oncology Group study. *J Clin Oncol* 21: 3194–3200.
- du Bois A, Luck HJ, Meier W, Adams HP, Mobus V, et al. (2003) A randomized clinical trial of cisplatin/paclitaxel versus carboplatin/paclitaxel as first-line treatment of ovarian cancer. *J Natl Cancer Inst* 95: 1320–1329.
- Holschneider CH, Berek JS (2000) Ovarian cancer: epidemiology, biology, and prognostic factors. *Semin Surg Oncol* 19: 3–10.
- Ozols RF (2000) Management of advanced ovarian cancer consensus summary. *Advanced Ovarian Cancer Consensus Faculty. Semin Oncol* 27: 47–49.
- Zhang L, Conejo-Garcia JR, Katsaros D, Gimotty PA, Massobrio M, et al. (2003) Intratumoral T cells, recurrence, and survival in epithelial ovarian cancer. *N Engl J Med* 348: 203–213.
- Raspollini MR, Castiglione F, Rossi Degl'innocenti D, Amunni G, Villanucci A, et al. (2005) Tumour-infiltrating gamma/delta T-lymphocytes are correlated with a brief disease-free interval in advanced ovarian serous carcinoma. *Ann Oncol* 16: 590–596.
- Tomsova M, Melichar B, Sedlakova I, Steiner I (2008) Prognostic significance of CD3+ tumor-infiltrating lymphocytes in ovarian carcinoma. *Gynecol Oncol* 108: 415–420.
- Nelson BH (2008) The impact of T-cell immunity on ovarian cancer outcomes. *Immunol Rev* 222: 101–116.
- Gimotty PA, Zhang L, Alagkiozidis I, Cadungog M, Adams S, et al. (2007) Immune prognostic factors in ovarian cancer: lessons from translational research. *Dis Markers* 23: 445–452.
- Sato E, Olson SH, Ahn J, Bundy B, Nishikawa H, et al. (2005) Intraepithelial CD8+ tumor-infiltrating lymphocytes and a high CD8+/regulatory T cell ratio are associated with favorable prognosis in ovarian cancer. *Proc Natl Acad Sci U S A* 102: 18538–18543.
- Hamanishi J, Mandai M, Iwasaki M, Okazaki T, Tanaka Y, et al. (2007) Programmed cell death 1 ligand 1 and tumor-infiltrating CD8+ T lymphocytes are prognostic factors of human ovarian cancer. *Proc Natl Acad Sci U S A* 104: 3360–3365.
- Clarke B, Tinker AV, Lee CH, Subramanian S, van de Rijn M, et al. (2009) Intraepithelial T cells and prognosis in ovarian carcinoma: novel associations with stage, tumor type, and BRCA1 loss. *Mod Pathol* 22: 393–402.
- Liu M, Matsumura N, Mandai M, Li K, Yagi H, et al. (2009) Classification using hierarchical clustering of tumor-infiltrating immune cells identifies poor prognostic ovarian cancers with high levels of COX expression. *Mod Pathol* 22: 373–384.
- Leffers N, Gooden MJ, de Jong RA, Hoogbeem BN, ten Hoor KA, et al. (2009) Prognostic significance of tumor-infiltrating T-lymphocytes in primary and metastatic lesions of advanced stage ovarian cancer. *Cancer Immunol Immunother* 58: 449–459.
- Callahan MJ, Nagymanyoki Z, Bonome T, Johnson ME, Litkouhi B, et al. (2008) Increased HLA-DMB expression in the tumor epithelium is associated with increased CTL infiltration and improved prognosis in advanced-stage serous ovarian cancer. *Clin Cancer Res* 14: 7667–7673.
- Matsushita N, Ghazizadeh M, Konishi H, Araki T (2003) Association of ovarian tumor epithelium coexpressing HLA-DR and CA-125 antigens with tumor infiltrating cytotoxic T lymphocytes. *J Nippon Med Sch* 70: 40–44.
- Han LY, Fletcher MS, Urbauer DL, Mueller P, Landen CN, et al. (2008) HLA Class I Antigen Processing Machinery Component Expression and Intratu-

### Author Contributions

Conceived and designed the experiments: KM BN. Performed the experiments: KM. Analyzed the data: KM MK SEK DG CBG. Contributed reagents/materials/analysis tools: SEK RB. Wrote the paper: KM BN. Performed histological scoring: MK DG CBG. Contributed suggestions/revisions to paper: MK SEK RB CBG PHW. Ethics acquisition: RB.

- moral T-Cell Infiltrate as Independent Prognostic Markers in Ovarian Carcinoma. *Clin Cancer Res* 14: 3372–3379.
18. Marth C, Fiegl H, Zeimet AG, Muller-Holzner E, Deibl M, et al. (2004) Interferon-gamma expression is an independent prognostic factor in ovarian cancer. *Am J Obstet Gynecol* 191: 1598–1605.
  19. Kusuda T, Shigemasa K, Arihiro K, Fujii T, Nagai N, et al. (2005) Relative expression levels of Th1 and Th2 cytokine mRNA are independent prognostic factors in patients with ovarian cancer. *Oncol Rep* 13: 1153–1158.
  20. Duncan TJ, Rolland P, Deen S, Scott IV, Liu DT, et al. (2007) Loss of IFN gamma receptor is an independent prognostic factor in ovarian cancer. *Clin Cancer Res* 13: 4139–4145.
  21. Zeimet AG, Reimer D, Wolf D, Fiegl H, Concin N, et al. (2008) Intratumoral interferon regulatory factor (IRF)-1 but not IRF-2 is of relevance in predicting patient outcome in ovarian cancer. *Int J Cancer*.
  22. Akahiro J, Konno R, Ito K, Okamura K, Yaegashi N (2004) Impact of serum interleukin-18 level as a prognostic indicator in patients with epithelial ovarian carcinoma. *Int J Clin Oncol* 9: 42–46.
  23. Bamias A, Tsiatas ML, Kafantari E, Liakou C, Rodolakis A, et al. (2007) Significant differences of lymphocytes isolated from ascites of patients with ovarian cancer compared to blood and tumor lymphocytes. Association of CD3(+)/CD56(+) cells with platinum resistance. *Gynecol Oncol*.
  24. Rolland P, Deen S, Scott I, Durrant L, Spendlove I (2007) Human leukocyte antigen class I antigen expression is an independent prognostic factor in ovarian cancer. *Clin Cancer Res* 13: 3591–3596.
  25. Moore DH, Fowler WC Jr, Olafsson K (1990) Class I histocompatibility antigen expression: a prognostic factor for aneuploid ovarian cancers. 38: 458–461.
  26. Leffers N, Lambeck AJ, de Graeff P, Bijlsma AY, Daemen T, et al. (2008) Survival of ovarian cancer patients overexpressing the tumour antigen p53 is diminished in case of MHC class I down-regulation. *Gynecol Oncol* 110: 365–373.
  27. Wolf D, Wolf AM, Rumpold H, Fiegl H, Zeimet AG, et al. (2005) The expression of the regulatory T cell-specific forkhead box transcription factor FoxP3 is associated with poor prognosis in ovarian cancer. *Clin Cancer Res* 11: 8326–8331.
  28. Curiel TJ, Coukos G, Zou L, Alvarez X, Cheng P, et al. (2004) Specific recruitment of regulatory T cells in ovarian carcinoma fosters immune privilege and predicts reduced survival. *Nat Med* 10: 942–949.
  29. Woo EY, Chu CS, Goletz TJ, Schlienger K, Yeh H, et al. (2001) Regulatory CD4(+)/CD25(+) T cells in tumors from patients with early-stage non-small cell lung cancer and late-stage ovarian cancer. *Cancer Res* 61: 4766–4772.
  30. Miyara M, Sakaguchi S (2007) Natural regulatory T cells: mechanisms of suppression. *Trends Mol Med* 13: 108–116.
  31. Piccirillo CA (2008) Regulatory T cells in health and disease. *Cytokine* 43: 395–401.
  32. Kryczek I, Wei S, Zhu G, Myers L, Mottram P, et al. (2007) Relationship between B7-H4, regulatory T cells, and patient outcome in human ovarian carcinoma. *Cancer Res* 67: 8900–8905.
  33. Salama P, Phillips M, Grieu F, Morris M, Zeps N, et al. (2009) Tumor-infiltrating FOXP3+ T regulatory cells show strong prognostic significance in colorectal cancer. *J Clin Oncol* 27: 186–192.
  34. de Jong D, Koster A, Hagenbeek A, Raemaekers J, Veldhuizen D, et al. (2009) Impact of the tumor microenvironment on prognosis in follicular lymphoma is dependent on specific treatment protocols. *Haematologica* 94: 70–77.
  35. Ke X, Wang J, Li L, Chen IH, Wang H, et al. (2008) Roles of CD4+CD25(high) FOXP3+ Tregs in lymphomas and tumors are complex. *Front Biosci* 13: 3986–4001.
  36. Carreras J, Lopez-Guillermo A, Fox BC, Colomo L, Martinez A, et al. (2006) High numbers of tumor-infiltrating FOXP3-positive regulatory T cells are associated with improved overall survival in follicular lymphoma. *Blood* 108: 2957–2964.
  37. Erdman SE, Sohn JJ, Rao VP, Nambiar PR, Ge Z, et al. (2005) CD4+CD25+ regulatory lymphocytes induce regression of intestinal tumors in ApcMin/+ mice. *Cancer Res* 65: 3998–4004.
  38. Lund JM, Hsing L, Pham TT, Rudensky AY (2008) Coordination of early protective immunity to viral infection by regulatory T cells. *Science* 320: 1220–1224.
  39. Mahnke K, Schonfeld K, Fondel S, Ring S, Karakhanova S, et al. (2007) Depletion of CD4(+)/CD25(+) human regulatory T cells in vivo: Kinetics of Treg depletion and alterations in immune functions in vivo and in vitro. *Int J Cancer* 120: 2723–2733.
  40. Morse MA, Hobeika AC, Osada T, Serra D, Niedzwiecki D, et al. (2008) Depletion of human regulatory T cells specifically enhances antigen-specific immune responses to cancer vaccines. *Blood* 112: 610–618.
  41. Powell DJ Jr, Attia P, Ghetie V, Schindler J, Vitetta ES, et al. (2008) Partial reduction of human FOXP3+ CD4 T cells in vivo after CD25-directed recombinant immunotoxin administration. *J Immunother* 31: 189–198.
  42. Powell DJ Jr, Felipe-Silva A, Merino MJ, Ahmadzadeh M, Allen T, et al. (2007) Administration of a CD25-directed immunotoxin, LMB-2, to patients with metastatic melanoma induces a selective partial reduction in regulatory T cells in vivo. *J Immunol* 179: 4919–4928.
  43. Dannull J, Su Z, Rizzieri D, Yang BK, Coleman D, et al. (2005) Enhancement of vaccine-mediated antitumor immunity in cancer patients after depletion of regulatory T cells. *J Clin Invest* 115: 3623–3633.
  44. Rasku MA, Clem AL, Telang S, Taft B, Gettings K, et al. (2008) Transient T cell depletion causes regression of melanoma metastases. *J Transl Med* 6: 12.
  45. Barnett B, Kryczek I, Cheng P, Zou W, Curiel TJ (2005) Regulatory T cells in ovarian cancer: biology and therapeutic potential. *Am J Reprod Immunol* 54: 369–377.
  46. Wei S, Kryczek I, Zou L, Daniel B, Cheng P, et al. (2005) Plasmacytoid dendritic cells induce CD8+ regulatory T cells in human ovarian carcinoma. *Cancer Res* 65: 5020–5026.
  47. Zou W, Machelon V, Coulomb-L'Hermin A, Borvak J, Nome F, et al. (2001) Stromal-derived factor-1 in human tumors recruits and alters the function of plasmacytoid precursor dendritic cells. *Nat Med* 7: 1339–1346.
  48. Curiel TJ, Wei S, Dong H, Alvarez X, Cheng P, et al. (2003) Blockade of B7-H1 improves myeloid dendritic cell-mediated antitumor immunity. *Nat Med* 9: 562–567.
  49. Duluc D, Delneste Y, Tan F, Moles MP, Grimaud L, et al. (2007) Tumor-associated leukemia inhibitory factor and IL-6 skew monocyte differentiation into tumor-associated-macrophage-like cells. *Blood*.
  50. Hagemann T, Wilson J, Burke F, Kulbe H, Li NF, et al. (2006) Ovarian cancer cells polarize macrophages toward a tumor-associated phenotype. *J Immunol* 176: 5023–5032.
  51. Loercher AE, Nash MA, Kavanagh JJ, Platsoucas CD, Freedman RS (1999) Identification of an IL-10-producing HLA-DR-negative monocyte subset in the malignant ascites of patients with ovarian carcinoma that inhibits cytokine protein expression and proliferation of autologous T cells. *J Immunol* 163: 6251–6260.
  52. Kryczek I, Zou L, Rodriguez P, Zhu G, Wei S, et al. (2006) B7-H4 expression identifies a novel suppressive macrophage population in human ovarian carcinoma. *J Exp Med* 203: 871–881.
  53. Denkert C, Kobel M, Pest S, Koch I, Berger S, et al. (2002) Expression of cyclooxygenase 2 is an independent prognostic factor in human ovarian carcinoma. *Am J Pathol* 160: 893–903.
  54. Kobel M, Kaloger SE, Boyd N, McKinney S, Mehl E, et al. (2008) Ovarian carcinoma subtypes are different diseases: implications for biomarker studies. *PLoS Med* 5: e232.
  55. Gilks CB, Ionescu DN, Kaloger SE, Kobel M, Irving J, et al. (2008) Tumor cell type can be reproducibly diagnosed and is of independent prognostic significance in patients with maximally debulked ovarian carcinoma. *Human Pathology* In press.
  56. Brenchley JM, Douek DC, Ambrozak DR, Chatterji M, Betts MR, et al. (2002) Expansion of activated human naive T-cells precedes effector function. *Clin Exp Immunol* 130: 432–440.
  57. Weinberg AD (2002) OX40: targeted immunotherapy—implications for tempering autoimmunity and enhancing vaccines. *Trends Immunol* 23: 102–109.
  58. Pipkin ME, Lieberman J (2007) Delivering the kiss of death: progress on understanding how perforin works. *Curr Opin Immunol* 19: 301–308.
  59. Kawakami A, Tian Q, Duan X, Streuli M, Schlossman SF, et al. (1992) Identification and functional characterization of a TIA-1-related nucleolysin. *Proc Natl Acad Sci U S A* 89: 8681–8685.
  60. Kanavaros P, Boulland ML, Petit B, Arnulf B, Gaulard P (2000) Expression of cytotoxic proteins in peripheral T-cell and natural killer-cell (NK) lymphomas: association with extranodal site, NK or T<sub>H</sub>1 phenotype, anaplastic morphology and CD30 expression. *Leuk Lymphoma* 38: 317–326.
  61. Ziegler SF (2007) FOXP3: not just for regulatory T cells anymore. *Eur J Immunol* 37: 21–23.
  62. Zou W (2006) Regulatory T cells, tumour immunity and immunotherapy. *Nat Rev Immunol* 6: 295–307.
  63. Edwards JC, Cambridge G (2006) B-cell targeting in rheumatoid arthritis and other autoimmune diseases. *Nat Rev Immunol* 6: 394–403.
  64. Ahmadi M, Emery DC, Morgan DJ (2008) Prevention of both direct and cross-priming of antitumor CD8+ T-cell responses following overproduction of prostaglandin E2 by tumor cells in vivo. *Cancer Res* 68: 7520–7529.
  65. Lang S, Tiwari S, Andratschke M, Leehr I, Lauffer L, et al. (2007) Immune restoration in head and neck cancer patients after in vivo COX-2 inhibition. *Cancer Immunol Immunother* 56: 1645–1652.
  66. Shah CA, Allison KH, Garcia RL, Gray HJ, Goff BA, et al. (2008) Intratumoral T cells, tumor-associated macrophages, and regulatory T cells: association with p53 mutations, circulating tumor DNA and survival in women with ovarian cancer. *Gynecol Oncol* 109: 215–219.
  67. Kooi S, Zhang HZ, Patenia R, Edwards CL, Platsoucas CD, et al. (1996) HLA class I expression on human ovarian carcinoma cells correlates with T-cell infiltration in vivo and T-cell expansion in vitro in low concentrations of recombinant interleukin-2. 174: 116–128.
  68. Buckanovich RJ, Facciabene A, Kim S, Benencia F, Sasaroli D, et al. (2008) Endothelin B receptor mediates the endothelial barrier to T cell homing to tumors and disables immune therapy. *Nat Med* 14: 28–36.
  69. Negus RP, Stamp GW, Hadley J, Balkwill FR (1997) Quantitative assessment of the leukocyte infiltrate in ovarian cancer and its relationship to the expression of C-C chemokines. *Am J Pathol* 150: 1723–1734.
  70. Tothill RW, Tinker AV, George J, Brown R, Fox SB, et al. (2008) Novel molecular subtypes of serous and endometrioid ovarian cancer linked to clinical outcome. *Clin Cancer Res* 14: 5198–5208.

71. Kuroda H, Tamaru J, Sakamoto G, Ohnisi K, Itoyama S (2005) Immunophenotype of lymphocytic infiltration in medullary carcinoma of the breast. *Virchows Arch* 446: 10–14.
72. Yakirevich E, Izhak OB, Rennert G, Kovacs ZG, Resnick MB (1999) Cytotoxic phenotype of tumor-infiltrating lymphocytes in medullary carcinoma of the breast. *Mod Pathol* 12: 1050–1056.
73. Lyle S, Salthany KE, Elder DE, Yakirevich E, Izhak OB, et al. (2000) TIA-1 positive tumor-infiltrating lymphocytes in nevi and melanomas.
74. Hasselblom S, Sigurdadotir M, Hansson U, Nilsson-Ehle H, Ridell B, et al. (2007) The number of tumour-infiltrating TIA-1+ cytotoxic T cells but not FOXP3+ regulatory T cells predicts outcome in diffuse large B-cell lymphoma. *Br J Haematol* 137: 364–373.
75. Chetaille B, Bertucci F, Finetti P, Esterni B, Stamatoullas A, et al. (2009) Molecular profiling of classical Hodgkin lymphoma tissues uncovers variations in the tumor microenvironment and correlations with EBV infection and outcome.
76. Asano N, Oshiro A, Matsuo K, Kagami Y, Ishida F, et al. (2006) Prognostic significance of T-cell or cytotoxic molecules phenotype in classical Hodgkin's lymphoma: a clinicopathologic study.
77. Alvaro-Naranjo T, Lejeune M, Salvado-Usach MT, Bosch-Princep R, Reverter-Branchat G, et al. (2005) Tumor-infiltrating cells as a prognostic factor in Hodgkin's lymphoma: a quantitative tissue microarray study in a large retrospective cohort of 267 patients.
78. Alvaro T, Lejeune M, Salvado MT, Bosch R, Garcia JF, et al. (2005) Outcome in Hodgkin's lymphoma can be predicted from the presence of accompanying cytotoxic and regulatory T cells.
79. Anderson P, Phillips K, Stoecklin G, Kedersha N (2004) Post-transcriptional regulation of proinflammatory proteins. *J Leukoc Biol* 76: 42–47.
80. Woo YL, Sterling J, Crawford R, van der Burg SH, Coleman N, et al. (2008) FOXP3 immunohistochemistry on formalin-fixed paraffin-embedded tissue: poor correlation between different antibodies. *J Clin Pathol* 61: 969–971.
81. Mizukami Y, Kono K, Kawaguchi Y, Akaike H, Kamimura K, et al. (2008) Localisation pattern of Foxp3+ regulatory T cells is associated with clinical behaviour in gastric cancer. *Br J Cancer* 98: 148–153.
82. Ahmadzadeh M, Felipe-Silva A, Heemskerck B, Powell DJ Jr, Wunderlich JR, et al. (2008) FOXP3 expression accurately defines the population of intratumoral regulatory T cells that selectively accumulate in metastatic melanoma lesions. *Blood* 112: 4953–4960.
83. Kryczek I, Liu R, Wang G, Wu K, Shu X, et al. (2009) FOXP3 defines regulatory T cells in human tumor and autoimmune disease. *Cancer Res* 69: 3995–4000.
84. Karanikas V, Speletas M, Zamanakou M, Kalala F, Loules G, et al. (2008) Foxp3 expression in human cancer cells. *J Transl Med* 6: 19.
85. Hinz S, Pagerols-Raluy L, Oberg HH, Ammerpohl O, Grussel S, et al. (2007) Foxp3 expression in pancreatic carcinoma cells as a novel mechanism of immune evasion in cancer. *Cancer Res* 67: 8344–8350.
86. Ebert LM, Tan BS, Browning J, Svobodova S, Russell SE, et al. (2008) The regulatory T cell-associated transcription factor FoxP3 is expressed by tumor cells. *Cancer Res* 68: 3001–3009.
87. Walker MR, Kasprzewicz DJ, Gersuk VH, Benard A, Van Landeghen M, et al. (2003) Induction of FoxP3 and acquisition of T regulatory activity by stimulated human CD4+CD25- T cells. *J Clin Invest* 112: 1437–1443.
88. Morgan ME, van Bilsen JH, Bakker AM, Heemskerck B, Schilham MW, et al. (2005) Expression of FOXP3 mRNA is not confined to CD4+CD25+ T regulatory cells in humans. *Hum Immunol* 66: 13–20.
89. Roncador G, Brown PJ, Maestre L, Hue S, Martinez-Torrecuadrada JL, et al. (2005) Analysis of FOXP3 protein expression in human CD4+CD25+ regulatory T cells at the single-cell level. *Eur J Immunol* 35: 1681–1691.
90. Gavin MA, Torgerson TR, Houston E, DeRoos P, Ho WY, et al. (2006) Single-cell analysis of normal and FOXP3-mutant human T cells: FOXP3 expression without regulatory T cell development. *Proc Natl Acad Sci U S A* 103: 6659–6664.
91. Tran DQ, Ramsey H, Shevach EM (2007) Induction of FOXP3 expression in naive human CD4+FOXP3 T cells by T-cell receptor stimulation is transforming growth factor-beta dependent but does not confer a regulatory phenotype. *Blood* 110: 2983–2990.
92. Pillai V, Ortega SB, Wang CK, Karandikar NJ (2007) Transient regulatory T-cells: a state attained by all activated human T-cells. *Clin Immunol* 123: 18–29.
93. Wang J, Ioan-Facsinay A, van der Voort EI, Huizinga TW, Toes RE (2007) Transient expression of FOXP3 in human activated nonregulatory CD4+ T cells. *Eur J Immunol* 37: 129–138.
94. Allan SE, Crome SQ, Crellin NK, Passerini L, Steiner TS, et al. (2007) Activation-induced FOXP3 in human T effector cells does not suppress proliferation or cytokine production. *International immunology* 19: 345–354.
95. Imamichi H, Sereti I, Lane HC (2008) IL-15 acts as a potent inducer of CD4+(CD25(hi)) cells expressing FOXP3. *Eur J Immunol* 38: 1621–1630.
96. Roncarolo MG, Gregori S (2008) Is FOXP3 a bona fide marker for human regulatory T cells? *Eur J Immunol* 38: 925–927.
97. Kleiweietfeld M, Starke M, Di Mitri D, Borsellino G, Battistini L, et al. (2009) CD49d provides access to "untouched" human Foxp3+ Treg free of contaminating effector cells. *Blood* 113: 827–836.
98. Banham AH (2006) Cell-surface IL-7 receptor expression facilitates the purification of FOXP3(+) regulatory T cells. *Trends Immunol* 27: 541–544.
99. Alvaro T, Lejeune M, Salvado MT, Bosch R, Garcia JF, et al. (2005) Outcome in Hodgkin's lymphoma can be predicted from the presence of accompanying cytotoxic and regulatory T cells. *Clin Cancer Res* 11: 1467–1473.
100. Badoual C, Hans S, Rodriguez J, Peyrard S, Klein C, et al. (2006) Prognostic value of tumor-infiltrating CD4+ T-cell subpopulations in head and neck cancers. *Clin Cancer Res* 12: 465–472.
101. Lee AM, Clear AJ, Calaminici M, Davies AJ, Jordan S, et al. (2006) Number of CD4+ cells and location of forkhead box protein P3-positive cells in diagnostic follicular lymphoma tissue microarrays correlates with outcome. *J Clin Oncol* 24: 5052–5059.
102. Badoual C, Hans S, Fridman WH, Brasnu D, Erdman S, et al. (2009) Revisiting the Prognostic Value of Regulatory T Cells in Patients With Cancer. *J Clin Oncol*.
103. Hillen F, Baeten CI, van de Winkel A, Creyten D, van der Schaft DW, et al. (2008) Leukocyte infiltration and tumor cell plasticity are parameters of aggressiveness in primary cutaneous melanoma. *Cancer Immunol Immunother* 57: 97–106.
104. Ayyoub M, Deknuydt F, Raimbaud I, Dousset C, Leveque L, et al. (2009) Human memory FOXP3+ Tregs secrete IL-17 ex vivo and constitutively express the TH17 lineage-specific transcription factor ROR{gamma}t.
105. Voo KS, Wang YH, Santori FR, Boggiano C, Arima K, et al. (2009) Identification of IL-17-producing FOXP3+ regulatory T cells in humans. *Proc Natl Acad Sci U S A* 106: 4793–4798.
106. Koenen HJ, Smeets RL, Vink PM, van Rijssen E, Boots AM, et al. (2008) Human CD25highFoxp3pos regulatory T cells differentiate into IL-17-producing cells. *Blood* 112: 2340–2352.
107. Bettelli E, Carrier Y, Gao W, Korn T, Strom TB, et al. (2006) Reciprocal developmental pathways for the generation of pathogenic effector TH17 and regulatory T cells. *Nature* 441: 235–238.
108. Veldhoen M, Hocking RJ, Atkins CJ, Locksley RM, Stockinger B (2006) TGFbeta in the context of an inflammatory cytokine milieu supports de novo differentiation of IL-17-producing T cells. *Immunity* 24: 179–189.
109. Stockinger B, Veldhoen M (2007) Differentiation and function of Th17 T cells. *Curr Opin Immunol* 19: 281–286.
110. Kato T, Furumoto H, Ogura T, Onishi Y, Irahara M, et al. (2001) Expression of IL-17 mRNA in ovarian cancer. *Biochem Biophys Res Commun* 282: 735–738.
111. Miyahara Y, Odunsi K, Chen W, Peng G, Matsuzaki J, et al. (2008) Generation and regulation of human CD4+ IL-17-producing T cells in ovarian cancer. *Proc Natl Acad Sci U S A* 105: 15505–15510.
112. Leveque L, Deknuydt F, Boley G, Old LJ, Matsuzaki J, et al. (2009) Interleukin 2-mediated conversion of ovarian cancer-associated CD4+ regulatory T cells into proinflammatory interleukin 17-producing helper T cells. *J Immunother* 32: 101–108.
113. Dong HP, Elstrand MB, Holth A, Silins I, Berner A, et al. (2006) NK- and B-cell infiltration correlates with worse outcome in metastatic ovarian carcinoma. *Am J Clin Pathol* 125: 451–458.
114. Hansen MH, Nielsen HV, Ditzel HJ (2002) Translocation of an intracellular antigen to the surface of medullary breast cancer cells early in apoptosis allows for an antigen-driven antibody response elicited by tumor-infiltrating B cells. *J Immunol* 169: 2701–2711.
115. Hansen MH, Nielsen H, Ditzel HJ (2001) The tumor-infiltrating B cell response in medullary breast cancer is oligoclonal and directed against the autoantigen actin exposed on the surface of apoptotic cancer cells. *Proc Natl Acad Sci U S A* 98: 12659–12664.
116. Schmidt M, Bohm D, von Torne C, Steiner E, Puhl A, et al. (2008) The humoral immune system has a key prognostic impact in node-negative breast cancer. *Cancer Res* 68: 5405–5413.
117. Wang Y, Ylera F, Boston M, Kang SG, Kutok JL, et al. (2007) Focused antibody response in plasma cell-infiltrated non-medullary (NOS) breast cancers. *Breast Cancer Res Treat* 104: 129–144.
118. Coronella JA, Spier C, Welch M, Trevor KT, Stopeck AT, et al. (2002) Antigen-driven oligoclonal expansion of tumor-infiltrating B cells in infiltrating ductal carcinoma of the breast. *J Immunol* 169: 1829–1836.
119. Kotlan B, Simsa P, Teillaud JL, Fridman WH, Toth J, et al. (2005) Novel ganglioside antigen identified by B cells in human medullary breast carcinomas: the proof of principle concerning the tumor-infiltrating B lymphocytes. *J Immunol* 175: 2278–2285.
120. Nzula S, Going JJ, Stott DI (2003) Antigen-driven clonal proliferation, somatic hypermutation, and selection of B lymphocytes infiltrating human ductal breast carcinomas. *Cancer Res* 63: 3275–3280.
121. Kurt-Jones EA, Liano D, HayGlass KA, Benacerraf B, Sy MS, et al. (1988) The role of antigen-presenting B cells in T cell priming in vivo. Studies of B cell-deficient mice. *J Immunol* 140: 3773–3778.
122. Yanaba K, Bouaziz JD, Matsushita T, Magro CM, St Clair EW, et al. (2008) B-lymphocyte contributions to human autoimmune disease. *Immunol Rev* 223: 284–299.
123. Constant S, Schweitzer N, West J, Ranney P, Bottomly K (1995) B lymphocytes can be competent antigen-presenting cells for priming CD4+ T cells to protein antigens in vivo. *J Immunol* 155: 3734–3741.
124. Ron Y, De Baetselier P, Gordon J, Feldman M, Segal S (1981) Defective induction of antigen-reactive proliferating T cells in B cell-deprived mice. *Eur J Immunol* 11: 964–968.

125. Ron Y, Sprent J (1987) T cell priming in vivo: a major role for B cells in presenting antigen to T cells in lymph nodes. *J Immunol* 138: 2848–2856.
126. Janeway CA Jr, Ron J, Katz ME (1987) The B cell is the initiating antigen-presenting cell in peripheral lymph nodes. *J Immunol* 138: 1051–1055.
127. Liu Y, Wu Y, Ramarathnam L, Guo Y, Huszar D, et al. (1995) Gene-targeted B-deficient mice reveal a critical role for B cells in the CD4 T cell response. *Int Immunol* 7: 1353–1362.
128. Linton PJ, Harbertson J, Bradley LM (2000) A critical role for B cells in the development of memory CD4 cells. *J Immunol* 165: 5558–5565.
129. Crawford A, Macleod M, Schumacher T, Corlett L, Gray D (2006) Primary T cell expansion and differentiation in vivo requires antigen presentation by B cells. *J Immunol* 176: 3498–3506.
130. Shen H, Whitmire JK, Fan X, Shedlock DJ, Kaech SM, et al. (2003) A specific role for B cells in the generation of CD8 T cell memory by recombinant *Listeria monocytogenes*. *J Immunol* 170: 1443–1451.
131. Ronchese F, Hausmann B (1993) B lymphocytes in vivo fail to prime naive T cells but can stimulate antigen-experienced T lymphocytes. *J Exp Med* 177: 679–690.
132. Tamiolakis D, Simopoulos C, Cheva A, Lambropoulou M, Kotini A, et al. (2002) Immunophenotypic profile of tumor infiltrating lymphocytes in medullary carcinoma of the breast. *Eur J Gynaecol Oncol* 23: 433–436.
133. Al-Shibli KI, Donnem T, Al-Saad S, Persson M, Bremnes RM, et al. (2008) Prognostic effect of epithelial and stromal lymphocyte infiltration in non-small cell lung cancer. *Clin Cancer Res* 14: 5220–5227.
134. Nedergaard BS, Ladekar M, Nyengaard JR, Nielsen K (2008) A comparative study of the cellular immune response in patients with stage IB cervical squamous cell carcinoma. Low numbers of several immune cell subtypes are strongly associated with relapse of disease within 5 years. *Gynecol Oncol* 108: 106–111.
135. Bingle L, Brown NJ, Lewis CE (2002) The role of tumour-associated macrophages in tumour progression: implications for new anticancer therapies. *J Pathol* 196: 254–265.
136. Sica A, Larghi P, Mancino A, Rubino L, Porta C, et al. (2008) Macrophage polarization in tumour progression. *Semin Cancer Biol* 18: 349–355.
137. Gottfried E, Kunz-Schughart LA, Weber A, Rehli M, Peuker A, et al. (2008) Expression of CD68 in non-myeloid cell types. *Scand J Immunol* 67: 453–463.
